# Supplementary material for: Green Synthesis of Privileged Benzimidazole Scaffolds Using Active Deep Eutectic Solvent
Source: MDPI journal article supplement (doi:10.3390/molecules24162885), 2019-08-08

# Green Synthesis of Privileged Benzimidazole Scaffolds using Active Deep Eutectic Solvent

Maria Luisa Di Gioia<sup>1,\*</sup>, Roberta Cassano<sup>1</sup>, Paola Costanzo<sup>2\*</sup>, Natividad Herrera Cano<sup>3</sup>, Loredana Maiuolo<sup>4</sup>, Monica Nardi <sup>2</sup>, Fiore Pasquale Nicoletta,<sup>1</sup> Manuela Oliverio <sup>2</sup> and Antonio Procopio <sup>2</sup>

- 1 Dipartimento di Farmacia e Scienze della Salute e della Nutrizione, Dipartimento di Eccellenza L. 232/2016, Edificio Polifunzionale, Università della Calabria, 87036 Rende (CS), Italy; [ml.digioia@unical.it](mailto:ml.digioia@unical.it) (M.L.D.G.), [roberta.cassano@unical.it](mailto:roberta.cassano@unical.it) (R.C.), [nicolett@unical.it](mailto:nicolett@unical.it) (F.P.N.)
- 2 Department of Health Sciences, Magna Græcia University, Viale Europa, 88100 Germaneto CZ, Italy; [pcostanzo@unicz.it](mailto:pcostanzo@unicz.it) (P.C.); [monica.nardi@unicz.it](mailto:monica.nardi@unicz.it) (M.N.); [m.oliverio@unicz.it](mailto:m.oliverio@unicz.it) (M.O.); [procopio@unicz.it](mailto:procopio@unicz.it) (A.P.)
- 3 ICYTAC, CONICET and Universidad Nacional de Córdoba, Facultad de Ciencias Químicas, Departamento. Química Orgánica. Ciudad Universitaria, Bv. Juan Filloy s/n, 5000, Córdoba, Argentina; [nhc@fcq.unc.edu.ar](mailto:nhc@fcq.unc.edu.ar) (N.H.C.)
- 4 Dipartimento di Chimica e Tecnologie Chimiche, Via P. Bucci, cubo 12C, Università della Calabria, 87036 Rende (CS), Italy; [maiuolo@unical.it](mailto:maiuolo@unical.it) (L.M.);

\* Author to whom correspondence should be addressed: [ml.digioia@unical.it](mailto:ml.digioia@unical.it); Tel.: +39-0984 493095; [pcostanzo@unicz.it](mailto:pcostanzo@unicz.it); Tel.: +39 0961 3694120

**Electronic Supplementary Material**

## Table of Contents

|                                                                                                                  |
|------------------------------------------------------------------------------------------------------------------|
| <b>Experimental Section</b>                                                                                      |
| <i>General Procedure for DESs Preparation</i>                                                                    |
| <i>General Procedure for the Synthesis of 2-Substituted Benzimidazoles 1a–8a in the DES ChCl: o-PDA (1:1).</i>   |
| <i>General Procedure for the Synthesis of 1,2-Substituted Benzimidazoles 1b–8b in the DES ChCl: o-PDA (1:1).</i> |
| <i>MS(EI) spectra</i>                                                                                            |
| <i>Differential scanning analysis (DSC)</i>                                                                      |

### Experimental Section

All chemicals and solvents were purchased from common commercial sources and were used as received without any further purification. All reactions were monitored by GC/MS analysis and TLC on silica Merck 60 F<sub>254</sub> precoated aluminum plates. The GC-MS Shimadzu workstation was constituted by a GC 2010 (equipped with a 30 m-QUADREX 007-5MS capillary column, operating in “split” mode, 1 mL min<sup>-1</sup> flow of He as carrier gas) and a 2010 quadrupole mass-detector. Proton nuclear magnetic resonance (<sup>1</sup>H NMR) spectra were recorded on a Brüker spectrometer at 300 MHz. Chemical shifts are reported in δ units (ppm) with TMS as reference (δ 0.00). All coupling constants (J) are reported in Hertz. Multiplicity is indicated by one or more of the following: s (singlet), d (doublet), t (triplet), q (quartet), m (multiplet). Carbon nuclear magnetic resonance (<sup>13</sup>C NMR) spectra

were recorded on a Brüker at 75 MHz. Chemical shifts are reported in  $\delta$  units (ppm) relative to  $\text{CDCl}_3$  ( $\delta$  77.0).

#### **General Procedure for DESs Preparation.**

The  $\text{ChCl}:\text{urea}$  (1:2) DES was prepared as follows: Choline chloride (6.98 g, 50 mmol) and urea (6.00 g, 100 mmol) were added in a round-bottom flask under inert atmosphere. The mixture was magnetically stirred for 60 min at 80 °C until a clear colourless liquid was obtained. The obtained DES was used without need of purification.

For the preparation of  $\text{ChCl}:\text{o-PDA}$  (1:1) DES the following procedure was used: Choline chloride (6.98 g, 50 mmol) and o-phenyldiamine (5.40 g, 50 mmol) were mixed in a round-bottom flask under inert atmosphere. The mixture was magnetically stirred for 2 h at 80 °C until a clear yellow liquid was obtained. The obtained DES was characterized by DSC analysis and used without further purification.

#### **General Procedure for the Synthesis of 2-Substituted Benzimidazoles 1a–8a in the DES $\text{ChCl}:\text{o-PDA}$ (1:1).**

The appropriate aldehyde (1 mmol) was added to the  $\text{ChCl}:\text{o-PDA}$  (1:1) eutectic mixture (1 mL) under magnetic stirring. The resulting mixture was stirred at 80 °C for 8–10 min. The reaction was monitored by TLC and GC/MS analysis. After this time, 2 mL of  $\text{H}_2\text{O}$  were added. The resulting aqueous suspension was then extracted with  $\text{AcOEt}$  (3 x 2 mL). The organic phases were dried over  $\text{Na}_2\text{SO}_4$ , followed by evaporation under reduced pressure to give the corresponding products 1a–8a. Spectral data were in accordance with the literature [21].

The reaction of benzaldehyde in the ChCl:o-PDA DES to give 1a was scaled up using 20 mol (entry 1, Table 3, footnote c). The reaction was complete in 30 min with 93% isolated yield after simple water addition (10 mL) and extraction with 10 mL ethyl acetate.

**General Procedure for the Synthesis of 1,2-Substituted Benzimidazoles 1b–8b in the DES ChCl:o-PDA (1:1).**

The appropriate aldehyde (2 mmol) was added to the ChCl: o-PDA (1:1) eutectic mixture (1 mL) under magnetic stirring. The resulting mixture was stirred at 80 °C for 8–10 min. The reaction was monitored by TLC and GC/MS analysis. After this time, 2 mL of H<sub>2</sub>O were added. The resulting aqueous suspension was then extracted with AcOEt (3 × 2 mL). The organic phases were dried over Na<sub>2</sub>SO<sub>4</sub>, followed by evaporation under reduced pressure to give the corresponding products 1b–8b. Spectral data were in accordance with the literature [21].

## MS(EI) Spectra of Benzimidazole Derivatives

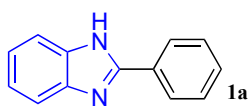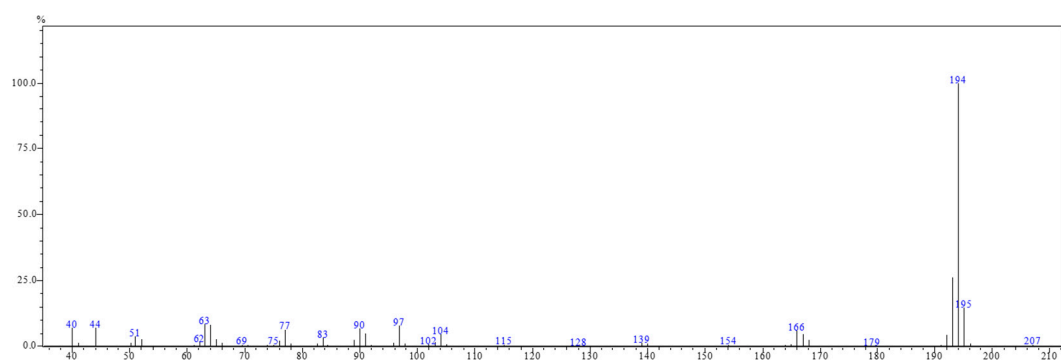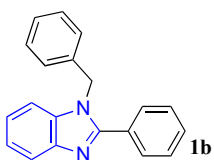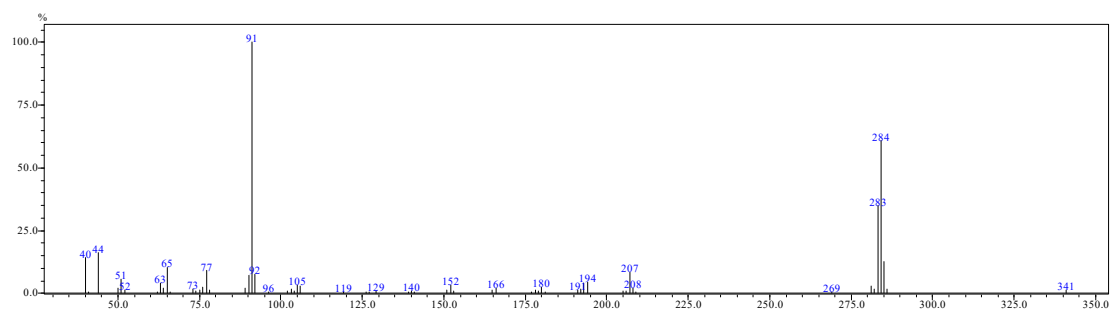

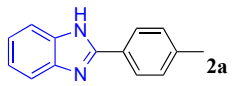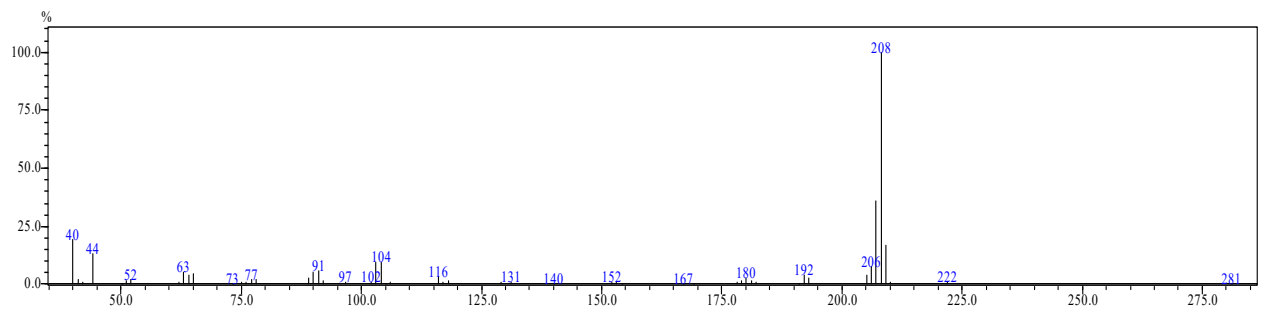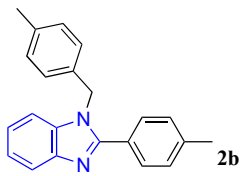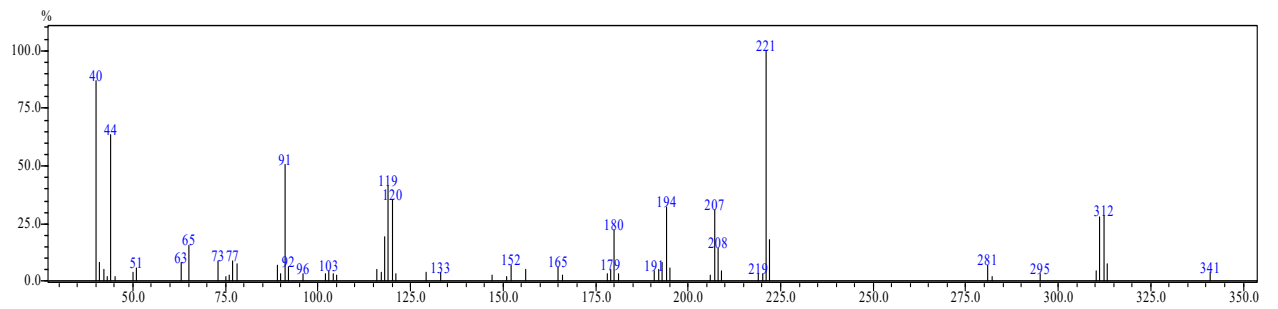

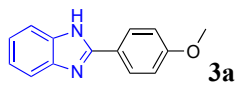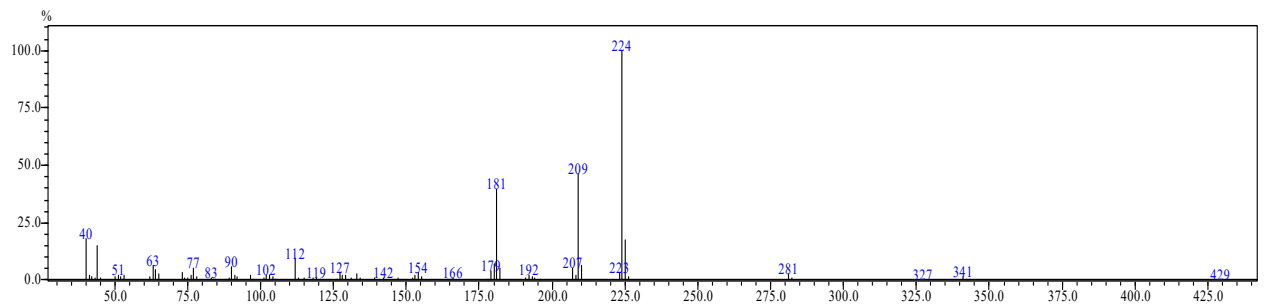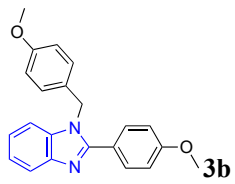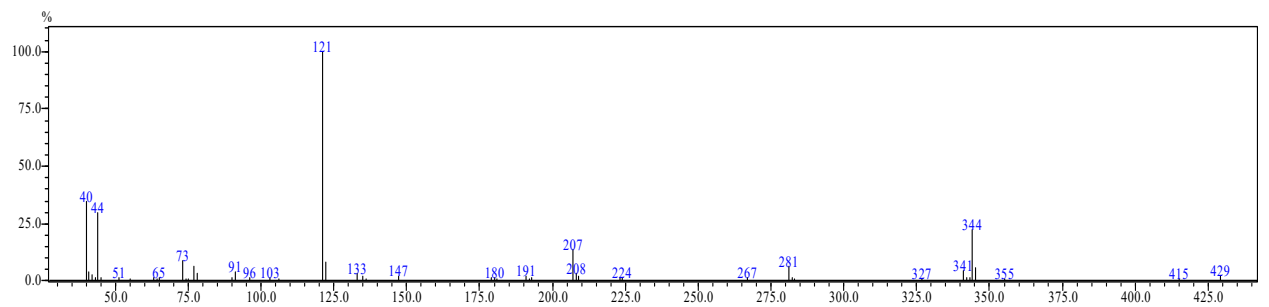

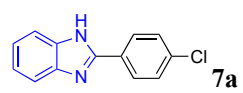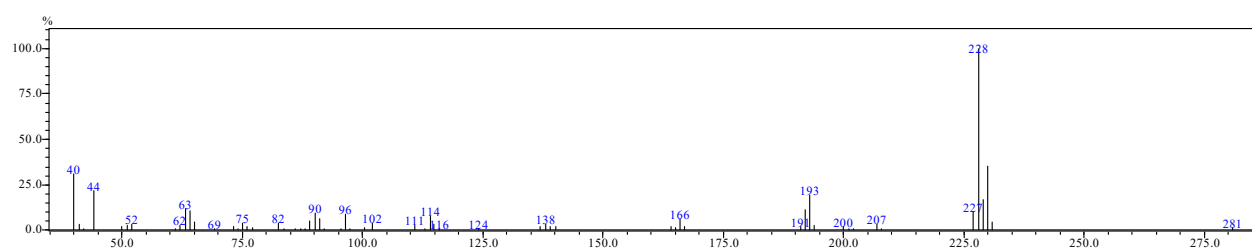



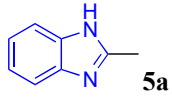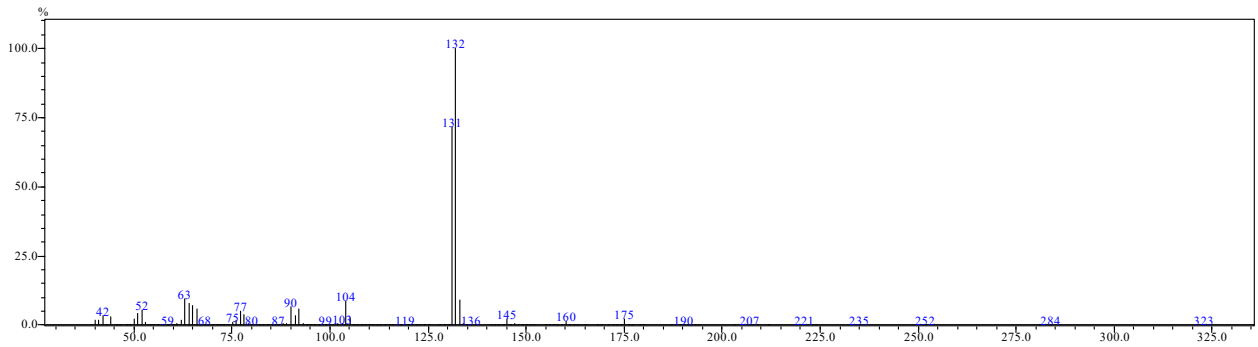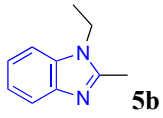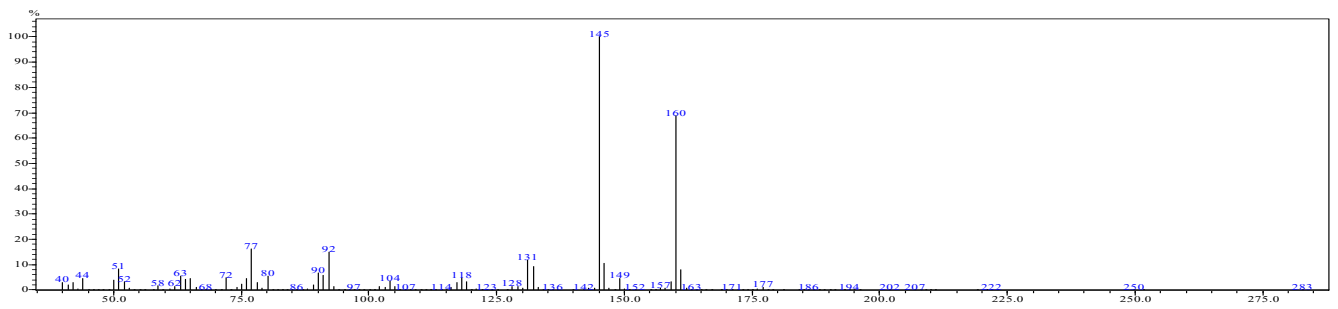

*Differential Scanning Analysis (DSC) of ChCl:o-PDA (1:1)*

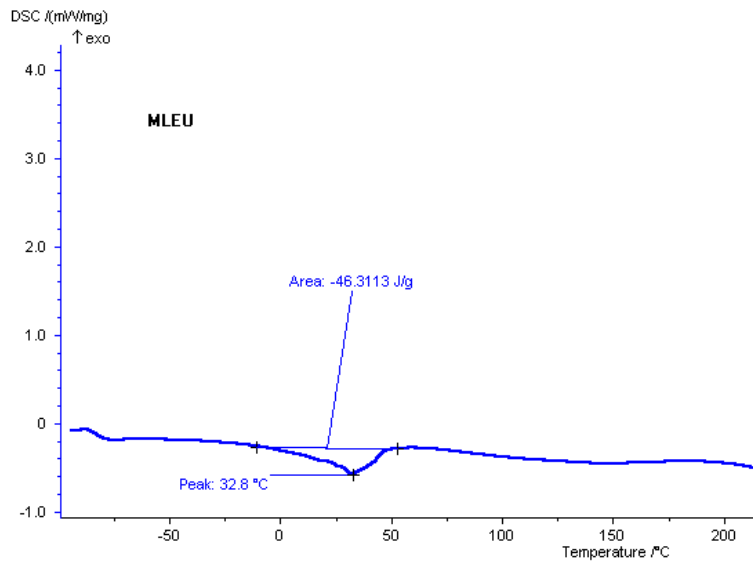

*Differential Scanning Analysis (DSC) of Pure o-PDA*

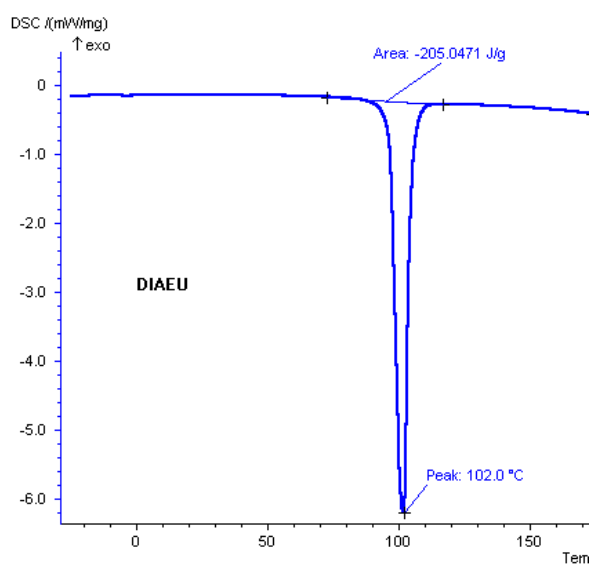

Supplement: s1 [file s1]
